# Supplementary material for: Rural trauma telementoring: a pilot project
Source: PubMed Central journal article supplement — Can J Surg. 2022 Sep 1;65(5):E567–72. doi: 10.1503/cjs.015020 (PMC9451502; doi:10.1503/cjs.015020), 2022-09-01
Supplement: CJS-015020-1-at.pdf [file CJS-015020-1-at.pdf]

**Appendix 1** to Hintz G, Haines V, Dawe P. Rural trauma telementoring: a pilot project. *Can J Surg* 2022. Copyright © 2022 The Author(s) or their employer(s). To receive this resource in an accessible format, please contact us at [cmajgroup.cmajca](mailto:cmajgroup.cmajca).

DOI: 10.1503/cjs.015020

*Online appendices are unedited and posted as supplied by the authors.*

## **Appendix 1. Supplementary material**

**QVH-VGH Telementorship Program  
Post-Session Reactions**

My role during the simulation scenario was: \_\_\_\_\_

*After this session, how confident do you feel with regards to your...*

**1. Ability to quickly and accurately assess a critically injured patient?**

|                          |                          |                                        |                                        |                                                  |
|--------------------------|--------------------------|----------------------------------------|----------------------------------------|--------------------------------------------------|
| Not at all confident     | Not very confident       | Confident in <i>good</i> circumstances | Confident in <i>most</i> circumstances | Confident in <i>all reasonable</i> circumstances |
| <input type="checkbox"/> | <input type="checkbox"/> | <input type="checkbox"/>               | <input type="checkbox"/>               | <input type="checkbox"/>                         |

**2. Ability to resuscitate and stabilize a critically injured patient?**

|                          |                          |                                        |                                        |                                                  |
|--------------------------|--------------------------|----------------------------------------|----------------------------------------|--------------------------------------------------|
| Not at all confident     | Not very confident       | Confident in <i>good</i> circumstances | Confident in <i>most</i> circumstances | Confident in <i>all reasonable</i> circumstances |
| <input type="checkbox"/> | <input type="checkbox"/> | <input type="checkbox"/>               | <input type="checkbox"/>               | <input type="checkbox"/>                         |

**3. Ability to implement evidence-based fluid management strategies?**

|                          |                          |                                        |                                        |                                                  |
|--------------------------|--------------------------|----------------------------------------|----------------------------------------|--------------------------------------------------|
| Not at all confident     | Not very confident       | Confident in <i>good</i> circumstances | Confident in <i>most</i> circumstances | Confident in <i>all reasonable</i> circumstances |
| <input type="checkbox"/> | <input type="checkbox"/> | <input type="checkbox"/>               | <input type="checkbox"/>               | <input type="checkbox"/>                         |

**4. Ability to recognize the need for bedside or operative procedures?**

|                          |                          |                                        |                                        |                                                  |
|--------------------------|--------------------------|----------------------------------------|----------------------------------------|--------------------------------------------------|
| Not at all confident     | Not very confident       | Confident in <i>good</i> circumstances | Confident in <i>most</i> circumstances | Confident in <i>all reasonable</i> circumstances |
| <input type="checkbox"/> | <input type="checkbox"/> | <input type="checkbox"/>               | <input type="checkbox"/>               | <input type="checkbox"/>                         |

**5. Ability to utilize the telehealth equipment to communicate with the on-call trauma surgeon at VGH?**

|                          |                          |                                        |                                        |                                                  |
|--------------------------|--------------------------|----------------------------------------|----------------------------------------|--------------------------------------------------|
| Not at all confident     | Not very confident       | Confident in <i>good</i> circumstances | Confident in <i>most</i> circumstances | Confident in <i>all reasonable</i> circumstances |
| <input type="checkbox"/> | <input type="checkbox"/> | <input type="checkbox"/>               | <input type="checkbox"/>               | <input type="checkbox"/>                         |

**6. Ability to carry out, with telementorship, trauma liver packing?**

|                          |                          |                                        |                                        |                                                  |
|--------------------------|--------------------------|----------------------------------------|----------------------------------------|--------------------------------------------------|
| Not at all confident     | Not very confident       | Confident in <i>good</i> circumstances | Confident in <i>most</i> circumstances | Confident in <i>all reasonable</i> circumstances |
| <input type="checkbox"/> | <input type="checkbox"/> | <input type="checkbox"/>               | <input type="checkbox"/>               | <input type="checkbox"/>                         |

**How helpful did you find this program?**

|                          |                          |                          |                          |
|--------------------------|--------------------------|--------------------------|--------------------------|
| Not at all helpful       | Not very helpful         | Somewhat helpful         | Very helpful             |
| <input type="checkbox"/> | <input type="checkbox"/> | <input type="checkbox"/> | <input type="checkbox"/> |

## TRAUMA NOTECHS

### Leadership

5

4

3

2

1

Clearly defined team leader. Good time management, all tasks completed, non-hierarchical.

Individual defined, but some tasks not completed.

Identity of team leader not clear.

### Cooperation and resource management

5

4

3

2

1

All team members clearly fill a role and perform all designated tasks.

Identity of all members not clear, some do not perform assigned tasks.

Unable to discern role identity of team members.

### Communication and interaction

5

4

3

2

1

Clear communication with Team Leader as a hub, relayed to scribe.

Communication not always through Team Leader, or not relayed rapidly to scribe

Unorganized or incoherent communication on many different levels

### Assessment and decision making

5

4

3

2

1

Orderly and complete 1° (ABCDE) and 2° surveys. Plan communicated to team.

Assessment somewhat out of order, all major tasks complete.

1° and 2° surveys disorderly and/or incomplete. Plan not clear.

### Situation awareness/coping with stress

5

4

3

2

1

Untoward findings and distractions did not upset systematic and orderly flow. Team is calm and plans ahead.

Untoward findings caused disruption but did not preclude task completion.

Untoward findings or interruptions completely upset orderly assessment and task completion. Not anticipatory.
